# Supplementary figures and images for: Clusters of cognitive performance predict long‐term cognitive impairment in elderly patients with subjective memory complaints and healthy controls
Source: PubMed Central journal article supplement — Alzheimers Dement. 2024 May 23;20(7):4702–16. doi: 10.1002/alz.13903 (PMC11247668; doi:10.1002/alz.13903), 2024-05-23

# Supplementary Figure 2: Silhouette plots corresponding to the CUN and ADNI datasets

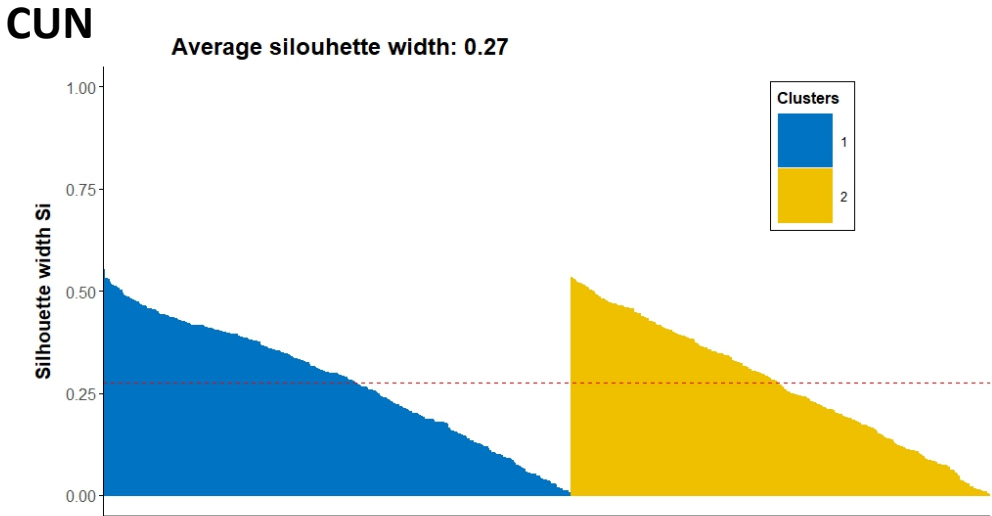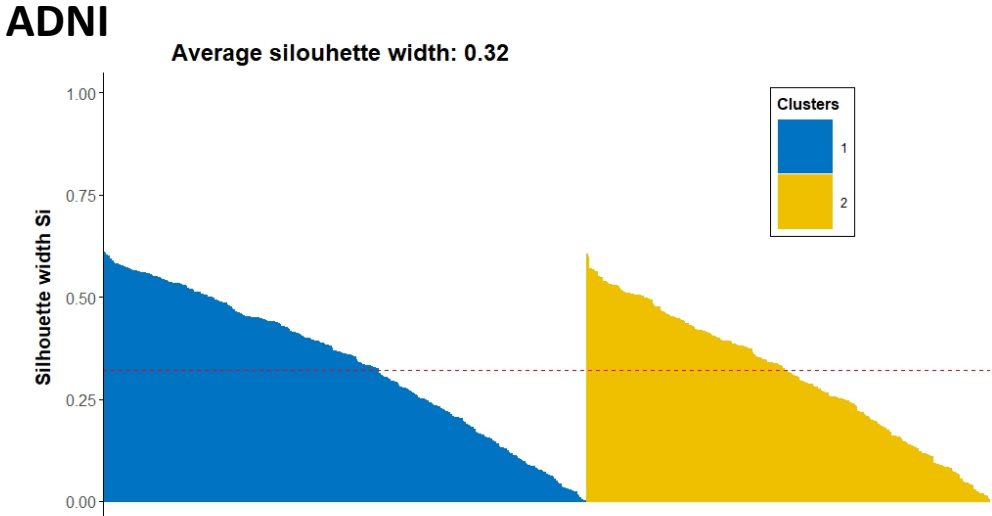

Supplement: ALZ-20-4702-s005.pdf [file ALZ-20-4702-s005.pdf]
